# Supplementary material for: Insights into the evolutionary history of tubercle bacilli as disclosed by genetic rearrangements within a PE_PGRS duplicated gene pair
Source: PubMed Central journal article supplement (PMC1762029; doi:10.1186/1471-2148-6-107), 2006-12-12

A

*M. tuberculosis*  
H37Rv

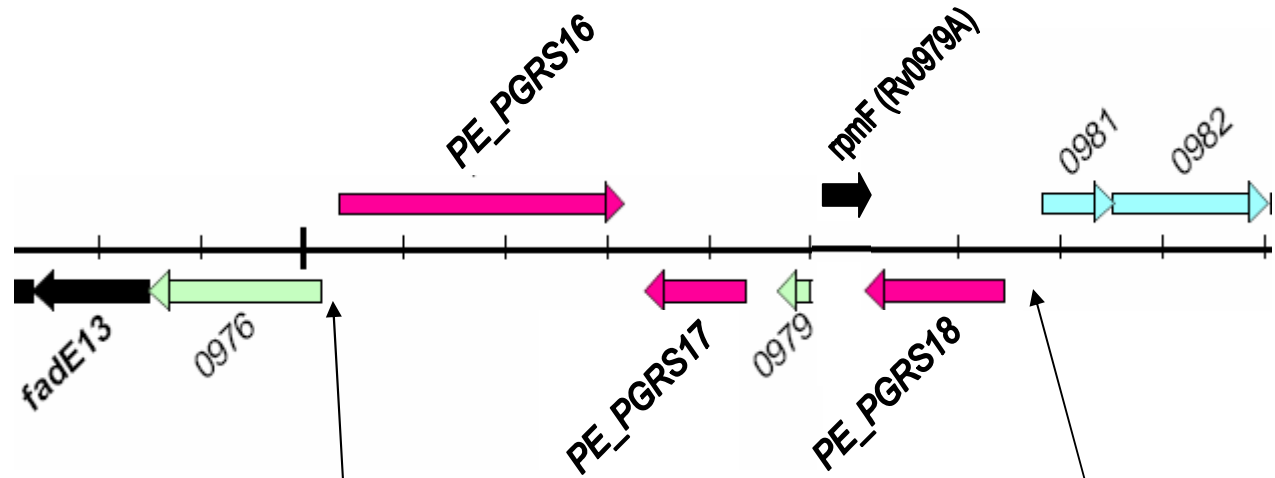

Space between *rpmF* (Rv0979A) and *mprA* (Rv0981) is 266 bp in *M. marinum* (compared to 1757 bp in *M. tuberculosis* H37Rv) and contains no gene in this small region. Of this 266 bp region, 43 bp shares homology to a part of the intergenic region downstream of the *PE\_PGRS18* gene in this location in *M. tuberculosis* - see arrow above and sequence alignment in additional data file 3.

*M. marinum*  
(as well as *M. ulcerans*  
and *M. avium*  
*paratuberculosis*)

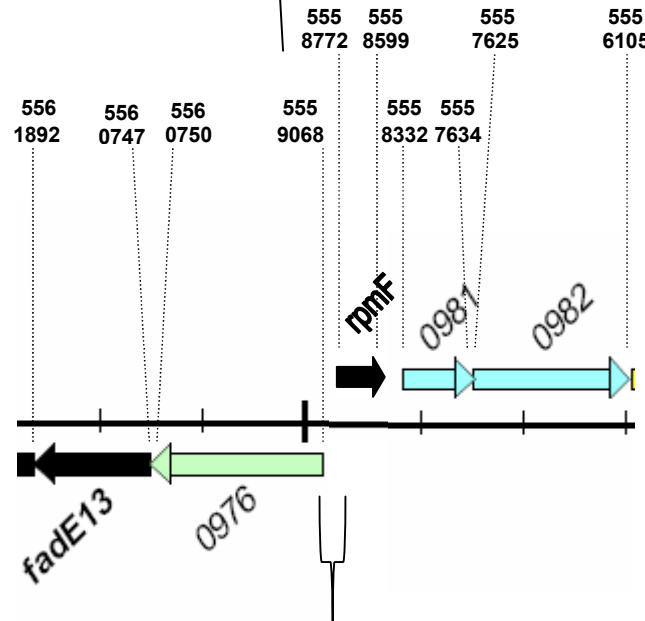

Space between Rv0976c and *rpmF* (Rv0979A) is 295 bp in *M. marinum* (compared to 4711 bp in *M. tuberculosis* H37Rv) and contains no gene in this small region. Of this 295 bp region, 27 bp shares homology to a part of the intergenic region downstream of the Rv0976 gene in this location in *M. tuberculosis* - see arrow above and sequence alignment in additional data file 3.

**B***M. tuberculosis* strain H37Rv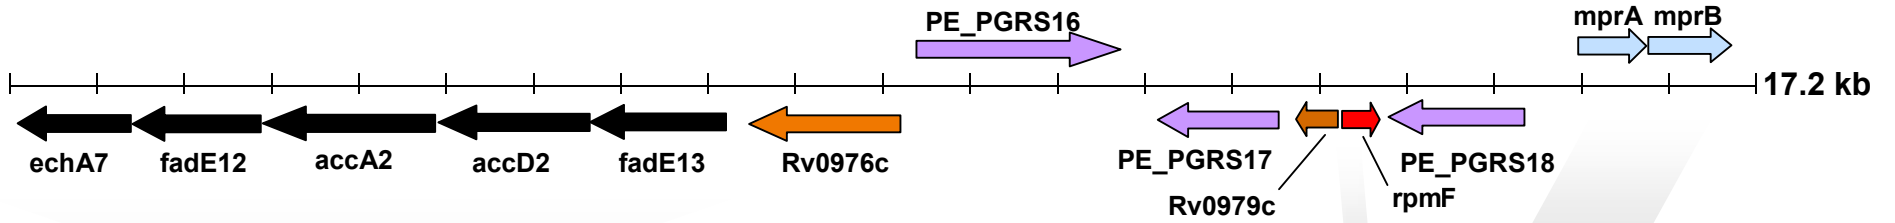*M. leprae* strain TN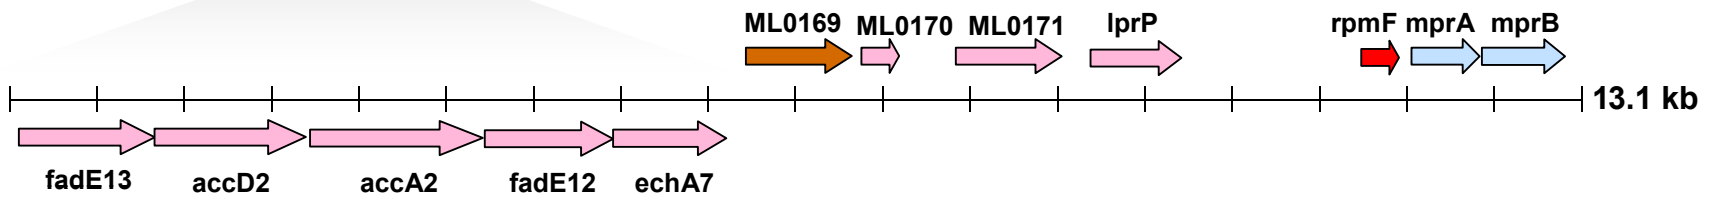

Supplement: 1471-2148-6-107-S2.pdf [file 1471-2148-6-107-S2.pdf]
