# Supplementary material for: Insights into the evolutionary history of tubercle bacilli as disclosed by genetic rearrangements within a PE_PGRS duplicated gene pair
Source: PubMed Central journal article supplement (PMC1762029; doi:10.1186/1471-2148-6-107), 2006-12-12
Supplement: 1471-2148-6-107-S5.pdf [file 1471-2148-6-107-S5.pdf]

|                                  | <i>M. tb</i> (n=41) |                      | <i>M. afr-M. mic-M. bov</i> and subspecies (n=56) |                       |    |                      | <i>M. can</i> (n=2) and STB (n=2) |                    |  |    |  |                            |
|----------------------------------|---------------------|----------------------|---------------------------------------------------|-----------------------|----|----------------------|-----------------------------------|--------------------|--|----|--|----------------------------|
|                                  | PE                  | PGRS17               | PE                                                | PGRS18                | PE | PGRS17               | PE                                | PGRS18             |  |    |  |                            |
| No. of gene copies               |                     | 41                   |                                                   | 41                    |    | 56                   |                                   | 56                 |  | 3  |  | 4                          |
| No. haplotypes                   |                     | 3                    |                                                   | 13                    |    | 7                    |                                   | 5                  |  | 1  |  | 3                          |
| No. of polymorphic sites         |                     | 2                    |                                                   | 18                    |    | 8                    |                                   | 9                  |  | 21 |  | 14                         |
| Number of observed transitions   |                     | 2                    |                                                   | 9                     |    | 5                    |                                   | 5                  |  | 10 |  | 7                          |
| Number of observed transversions |                     | 0                    |                                                   | 9                     |    | 3                    |                                   | 3                  |  | 10 |  | 6                          |
| Pi(s)                            |                     | 0,00429              |                                                   | 0,02656               |    | 0,003                |                                   | 0,008              |  | 0  |  | 0.02035                    |
| Pi(a)                            |                     | 0,00171              |                                                   | 0,00612               |    | 0,003                |                                   | 0,003              |  | 0  |  | 0.00528                    |
| Mean Ka (Range)                  |                     | 0.0013 (0 to 0.0026) |                                                   | 0,006 (0 to 0,012)    |    | 0,00321 (0 to 0,008) |                                   | 0,003 (0 to 0,006) |  | 0  |  | 0.0053 (0.004 to 0.008)    |
| Mean Ks (Range)                  |                     | 0.0065 (0.0065)      |                                                   | 0,027 (0,006 to 0,06) |    | 0,00306 (0 to 0,005) |                                   | 0,008 (0 to 0,015) |  | 0  |  | 0.02063 (0.0206 to 0.0207) |
| Mean Ka/Ks (Range)               |                     | 0.2 (0 to 0.4)       |                                                   | 0,273 (0 to 1,569)    |    | 1,019 (0 to 1,588)   |                                   | 0,293 (0 to 0,386) |  | NA |  | 0.258 (0.193 to 0.388)     |
