# Supplementary material for: Insights into the evolutionary history of tubercle bacilli as disclosed by genetic rearrangements within a PE_PGRS duplicated gene pair
Source: PubMed Central journal article supplement (PMC1762029; doi:10.1186/1471-2148-6-107), 2006-12-12
Supplement: 1471-2148-6-107-S6.pdf [file 1471-2148-6-107-S6.pdf]

| Analysis of Rv0978c            | GC content % |      |      | Substitutions/Site |      |      |
|--------------------------------|--------------|------|------|--------------------|------|------|
|                                | Pos1         | Pos2 | Pos3 | Pos1               | Pos2 | Pos3 |
| ST1 ( <i>M. tuberculosis</i> ) | 71.9         | 65.9 | 85.7 | 1                  | 0    | 0    |
| ST2 ( <i>M. tuberculosis</i> ) | 72.5         | 65.9 | 86.3 | 0                  | 0    | 1    |
| ST3 ( <i>M. caprae</i> )       | 72.5         | 65.4 | 86.8 | 2                  | 1    | 2    |
| ST4 ( <i>M. bovis</i> )        | 72.5         | 65.4 | 86.2 | 1                  | 1    | 2    |
| ST5 ( <i>M. bovis</i> )        | 72.5         | 65.4 | 86.2 | 0                  | 1    | 2    |
| ST6 ( <i>M. bovis</i> BCG)     | 72.5         | 65.4 | 86.2 | 0                  | 1    | 2    |
| ST7 ( <i>M. pinnipedii</i> )   | 72.5         | 65.4 | 86.8 | 1                  | 1    | 3    |
| ST8 ( <i>M. africanum</i> )    | 72           | 65.9 | 87.3 | 2                  | 0    | 4    |
| ST9 ( <i>M. canettii</i> )     | 73.9         | 66.1 | 87.3 | 5                  | 2    | 12   |
| ST10 ( <i>M. microti</i> )     | 68.1         | 60.4 | 85.4 | 1                  | 0    | 1    |

### Analysis of the GC content position by position

#### One-way analysis of variance

*P* value  $P < 0.0001$

*P* value summary Yes

#### Tukey's Multiple Comparison Test

|              | Mean Diff. | <i>P</i> value | 95% CI of diff   |
|--------------|------------|----------------|------------------|
| pos1 vs pos2 | 6,970      | $P < 0.001$    | 1.756 to 4.334   |
| pos1 vs pos3 | -14,33     | $P < 0.001$    | -8.894 to -6.316 |
| pos2 vs pos3 | -21,30     | $P < 0.001$    | -11.94 to -9.361 |

### Analysis of the distribution of substitutions

#### One-way analysis of variance

*P* value 0.0820

*P* value summary NS

#### Tukey's Multiple Comparison Test

|              | Mean Diff. | <i>P</i> value | 95% CI of diff   |
|--------------|------------|----------------|------------------|
| pos1 vs pos2 | 0.6000     | $P > 0.05$     | -1.808 to 3.008  |
| pos1 vs pos3 | -1.600     | $P > 0.05$     | -4.008 to 0.8075 |
| pos2 vs pos3 | -2.200     | $P > 0.05$     | -4.608 to 0.2075 |

| Analysis of Rv0980c             | GC content % |      |      | Substitutions/Site |      |      |
|---------------------------------|--------------|------|------|--------------------|------|------|
|                                 | Pos1         | Pos2 | Pos3 | Pos1               | Pos2 | Pos3 |
| ST1 ( <i>M. tuberculosis</i> )  | 75           | 66.9 | 79.4 | 0                  | 0    | 5    |
| ST2 ( <i>M. tuberculosis</i> )  | 75           | 66.3 | 79.9 | 0                  | 1    | 4    |
| ST3 ( <i>M. tuberculosis</i> )  | 75           | 66.9 | 84.7 | 0                  | 0    | 1    |
| ST4 ( <i>M. tuberculosis</i> )  | 75           | 66.9 | 80.4 | 0                  | 0    | 1    |
| ST5 ( <i>M. tuberculosis</i> )  | 75           | 66.9 | 79.4 | 0                  | 0    | 1    |
| ST6 ( <i>M. tuberculosis</i> )  | 75.6         | 66.9 | 78.3 | 2                  | 0    | 4    |
| ST7 ( <i>M. tuberculosis</i> )  | 75           | 66.9 | 78.8 | 0                  | 0    | 3    |
| ST8 ( <i>M. tuberculosis</i> )  | 77.4         | 66.9 | 79.3 | 1                  | 0    | 9    |
| ST9 ( <i>M. tuberculosis</i> )  | 74.5         | 66.9 | 79.8 | 2                  | 1    | 8    |
| ST10 ( <i>M. tuberculosis</i> ) | 73.9         | 66.9 | 80.4 | 2                  | 0    | 6    |
| ST11 ( <i>M. tuberculosis</i> ) | 74.4         | 66.9 | 80.9 | 1                  | 0    | 5    |
| ST12 ( <i>M. tuberculosis</i> ) | 75           | 66.9 | 78.8 | 1                  | 1    | 6    |
| ST13 ( <i>M. africanum</i> )    | 75.6         | 66.9 | 78.8 | 2                  | 0    | 3    |
| ST14 ( <i>M. bovis</i> BCG)     | 75           | 66.9 | 79.4 | 0                  | 0    | 1    |
| ST15 ( <i>M. microti</i> )      | 75           | 66.9 | 78.8 | 0                  | 0    | 0    |
| ST16 ( <i>M. pinnipedii</i> )   | 73.7         | 75.6 | 78.8 | 2                  | 0    | 3    |
| ST17 ( <i>M. caprae</i> )       | 75           | 66.9 | 79.4 | 0                  | 0    | 1    |
| ST18 ( <i>M. canetti</i> )      | 70.3         | 71.2 | 79.9 | 5                  | 0    | 1    |
| ST19 ( <i>M. bovis</i> )        | 75           | 66.9 | 79.4 | 0                  | 0    | 1    |

### Analysis of the GC content position by position

#### One-way analysis of variance

*P* value  $P < 0.0001$

*P* value summary Yes

#### Tukey's Multiple Comparison Test

|              | Mean Diff. | <i>P</i> value | 95% CI of diff   |
|--------------|------------|----------------|------------------|
| pos1 vs pos2 | 4          | $P < 0.001$    | 2.421 to 4.398   |
| pos1 vs pos3 | -4.632     | $P < 0.001$    | -3.304 to -1.327 |
| pos2 vs pos3 | -11.45     | $P < 0.001$    | -6.714 to -4.736 |

### Analysis of the distribution of substitutions

#### One-way analysis of variance

*P* value  $P < 0.0001$

*P* value summary Yes

#### Tukey's Multiple Comparison Test

|              | Mean Diff. | <i>P</i> value | 95% CI of diff   |
|--------------|------------|----------------|------------------|
| pos1 vs pos2 | 0.6250     | $P > 0.05$     | -0.7751 to 2.025 |
| pos1 vs pos3 | -2.938     | $P < 0.001$    | -4.338 to -1.537 |
| pos2 vs pos3 | -3.563     | $P < 0.001$    | -4.963 to -2.162 |
